## Correction

# Correction: Narrow Bottlenecks Affect *Pea Seedborne Mosaic Virus* Populations during Vertical Seed Transmission but not during Leaf Colonization

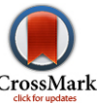

## The PLOS Pathogens Staff

In the Materials and Methods section, there is an error in the equation in the section titled “Estimation of the size of population bottlenecks during PSbMV seed transmission” that appears immediately after the phrase “The likelihood of a given model  $M_j$  is obtained as the product of R multinomial distributions as.”

The “z” should not appear in the equation. Please view the complete, correct equation here:

$$L_{M_j}(\Lambda) = L_{M_j}(X_{rs}, r=1, \dots, R, s=1, \dots, S_r | \Lambda) = \prod_{r=1}^R \left( \prod_{i=0}^1 \prod_{j=0}^1 (p_{r,\Lambda}^{ij})^{X_r^{ij}} \right)$$

## Reference

1. Fabre F, Moury B, Johansen EI, Simon V, Jacquemond M, et al. (2014) Narrow Bottlenecks Affect *Pea Seedborne Mosaic Virus* Populations during Vertical Seed Transmission but not during Leaf Colonization. PLoS Pathog 10(1): e1003833. doi:10.1371/journal.ppat.1003833

**Citation:** The PLOS Pathogens Staff (2014) Correction: Narrow Bottlenecks Affect *Pea Seedborne Mosaic Virus* Populations during Vertical Seed Transmission but not during Leaf Colonization. PLoS Pathog 10(9): e1004468. doi:10.1371/journal.ppat.1004468

**Published:** September 23, 2014

**Copyright:** © 2014 The PLOS Pathogens Staff. This is an open-access article distributed under the terms of the Creative Commons Attribution License, which permits unrestricted use, distribution, and reproduction in any medium, provided the original author and source are credited.
